# Supplementary material for: Understanding the nature of NH3-coordinated active sites and the complete reaction schemes for NH3-SCR using Cu-SAPO-34 catalysts
Source: Royal Society of Chemistry journal article supplement (doi:10.1039/d0cp06285e), 2021-01-01
Supplement: d0cp06285e1.pdf [file d0cp06285e1.pdf]

1 Understanding the nature of  $\text{NH}_3$ -coordinated active sites and complete reaction schemes for  $\text{NH}_3$ -SCR using  
2 Cu-SAPO-34 catalysts  
3 Guangpeng Yang<sup>a</sup>, Jingyu Ran<sup>a,\*</sup>, Xuesen Du<sup>a,\*</sup>, Xiangmin Wang<sup>a</sup>, Zhilin Ran<sup>c</sup>, Yanrong Chen<sup>a</sup>, Li Zhang<sup>a</sup>,  
4 John Crittenden<sup>b</sup>  
5 <sup>a</sup> Key Laboratory of Low-grade Energy Utilization Technologies and Systems, School of Energy and Power  
6 Engineering, Chongqing University, Chongqing, 400044, China  
7 <sup>b</sup> Brook Byers Institute for Sustainable Systems and School of Civil and Environmental Engineering, Georgia  
8 Institute of Technology, Atlanta, GA 30332, United States  
9 <sup>c</sup> School of Transportation and Environment, Shenzhen Institute of Information Technology, Shenzhen,  
10 518172, China

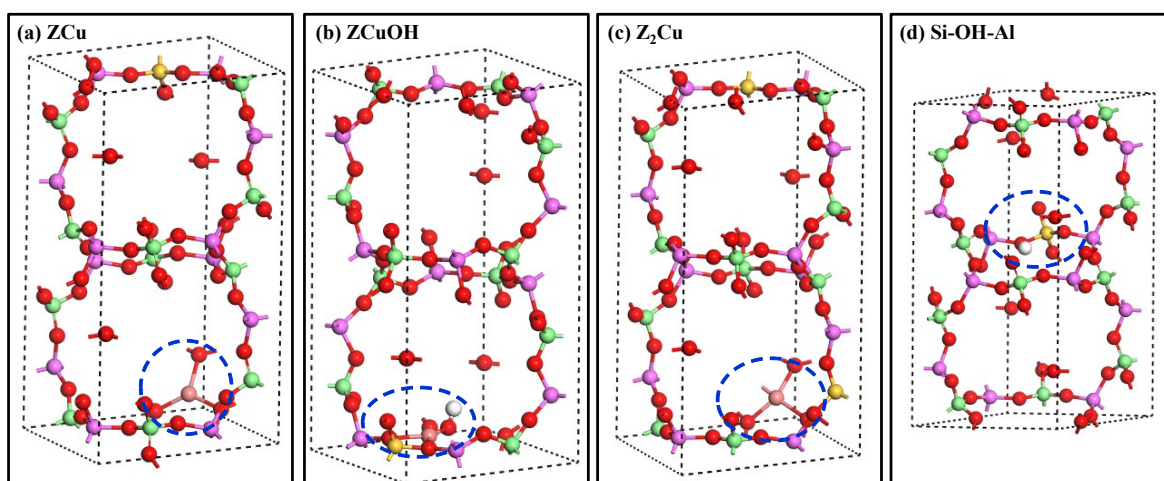

11  
12 Fig. S1 Optimized periodic structures of Cu-SAPO-34 with (a) ZCu, (b) ZCuOH and (c)  $\text{Z}_2\text{Cu}$  species, and  
13 (d) H-SAPO-34 configuration with Si-OH-Al in  $2 \times 1 \times 1$  supercells. Green, red, purple, yellow, orange, and  
14 white balls represent P, O, Al, Si, Cu, and H atoms, respectively. This assignment will be applied throughout  
15 the paper.

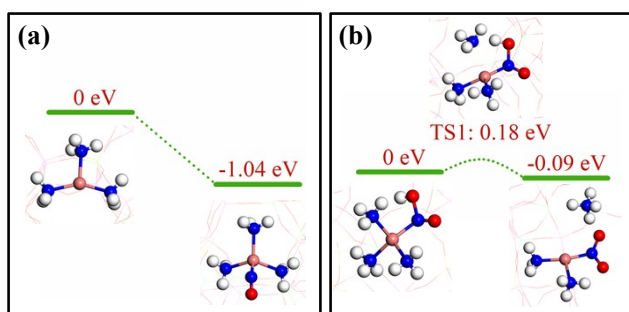

16  
17 Fig. S2 Energy profiles for (a) NO adsorption on  $\text{Z}_2\text{Cu-3NH}_3$  complex, and (b)  $\text{NH}_4\text{NO}_2$  formation on  
18  $\text{ZCuOH-3NH}_3$  complex. Blue balls represent N atoms, and this assignment will be applied throughout the  
19 paper.

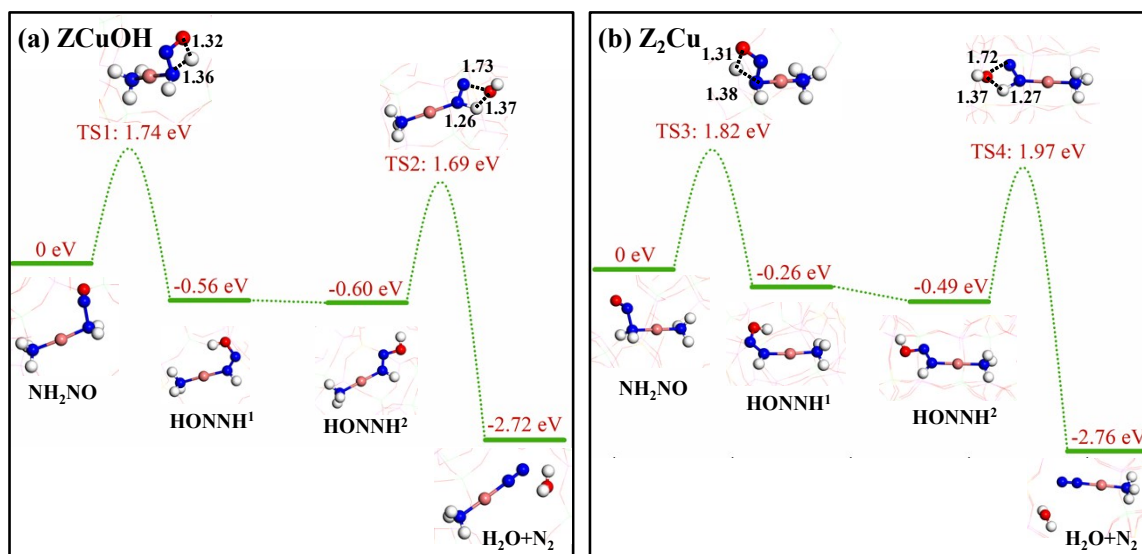

20

21 Fig. S3 Energy profiles for  $\text{NH}_2\text{NO}$  decomposition processes on (a)  $\text{ZCuOH}$ - $2\text{NH}_3$  complex and (b)  $\text{Z}_2\text{Cu}$ -  
22  $2\text{NH}_3$  complex.

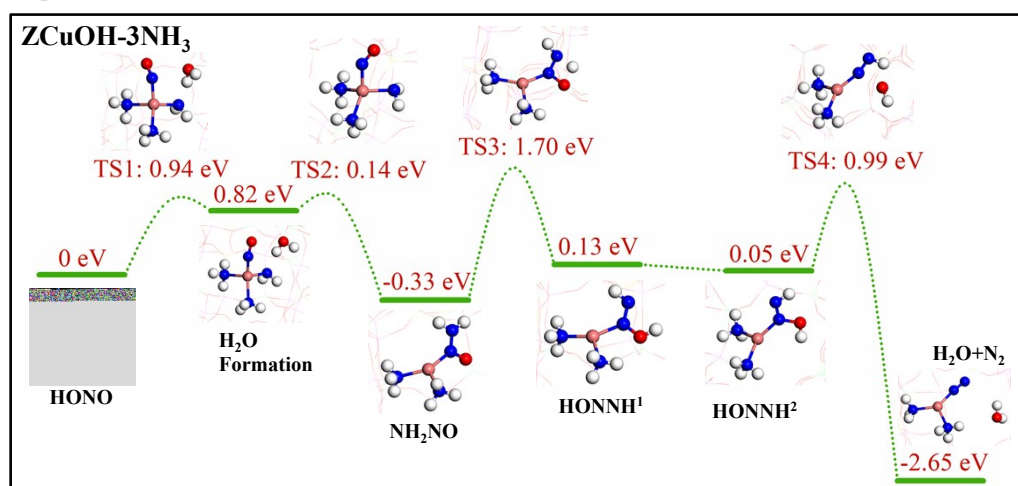

23

24 Fig. S4 Energy profiles for  $\text{NH}_2\text{NO}$  formation and decomposition processes on  $\text{ZCuOH}$ - $3\text{NH}_3$ .

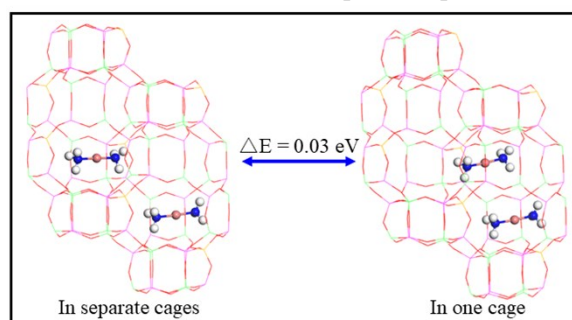

25

26 Fig. S5 Structures of two  $\text{ZCu}$ - $2\text{NH}_3$  complexes in separate cages and one cage, and energy difference of  
27 them.

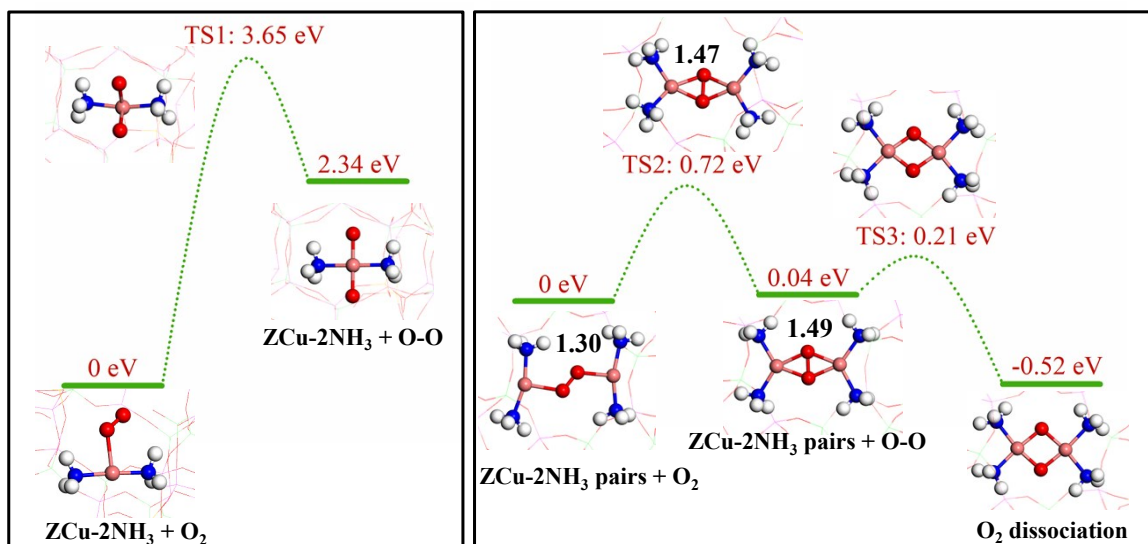

28

29 Fig. S6 Energy profiles for the dissociation of  $O_2$  on (a) a single  $ZCu-2NH_3$  site and (b) a pair of  $ZCu-2NH_3$   
 30 site in SAPO-34.

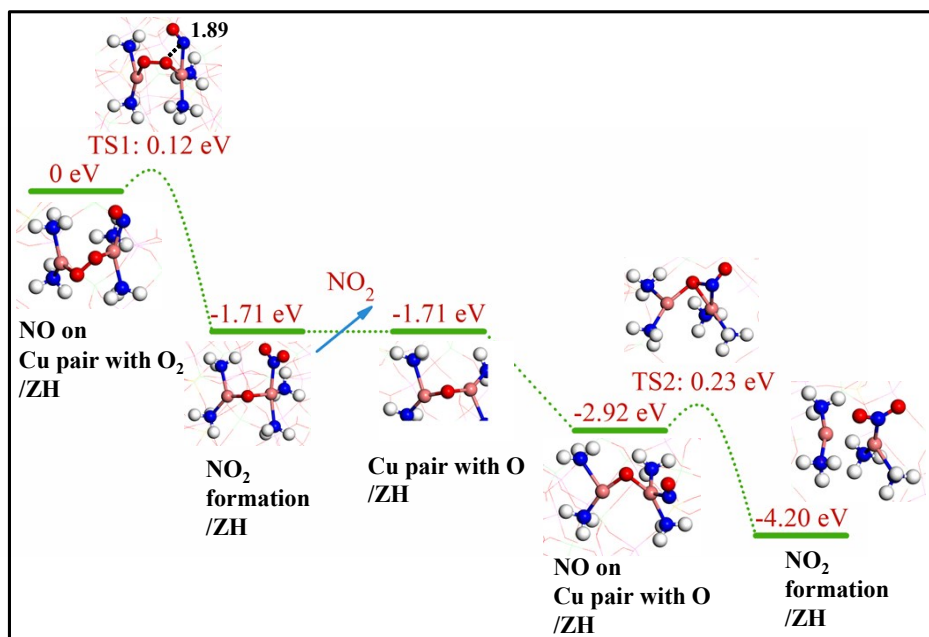

31

32 Fig. S7 Energy profiles for the re-oxidation process to produce  $Z_2Cu-2NH_3$  complex. Atomic distances are  
 33 in Å.
